# Supplementary material for: A Simple and Efficient CRISPR/Cas9 System Using a Ribonucleoprotein Method for Flammulina filiformis
Source: MDPI journal article supplement (doi:10.3390/jof8101000), 2022-09-23
Supplement: s1 [file s1]

WT GTGGCACTACAATACTCTAGTGGCGTACACAAAATCGCG-----AGCTGGTCACATATTACCAACGCCCACCCGG  
 (+1 nt) 10<sup>-1</sup> GTGGCACTACAATACTCTAGTGGCGTACACAAAATCGCGT-----AGCTGGTCACATATTACCAACGCCCACCCGG  
 (+33 nt) 10<sup>-2</sup> GTGGCACTACAATACTCTAGTGGCGTACACAAAATCGCGCAATCTCTTATACACATCTGTGATCGTCGTGCTAGCTGGTCACATATTACCAACGCCCACCCGG

G T G G C A C T A C A A T A C T C T A G T G G C G G T A C A C A A A A T C G C G A G C T G G T C A C A T A T T A C C A A C G C C C A C C C G G

WT

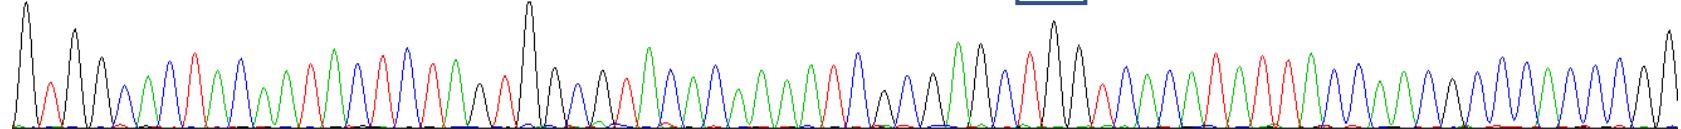

G T G G C A C T A C A A T A C T C T A G T G G C G G T A C A C A A A A T C G C G A G C T G G T C A C A T A T T A C C A A C G C C C A C C C G G

(+1 nt) 10<sup>-1</sup>

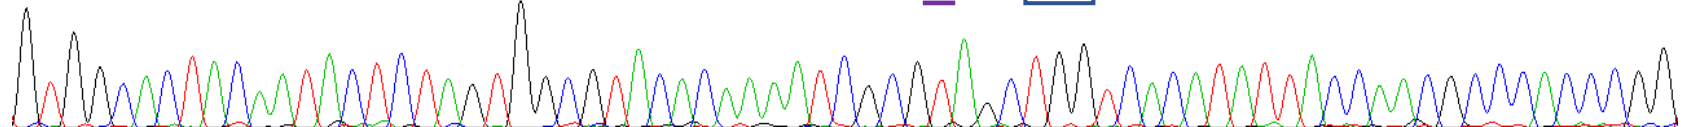

G T G G C A C T A C A A T A C T C T A G T G G C G G T A C A C A A A A T C G C G A A T C T C T T A T A C A C A T C T G T G A T C G T C G T G C T A G C T G G T C A C A T A T T A C C A A C G C C C A C C C G G

(+33 nt) 10<sup>-2</sup>

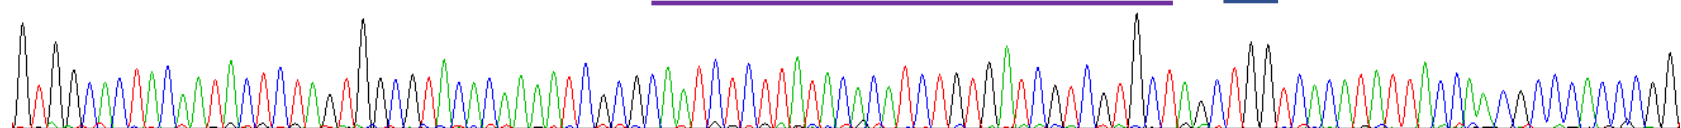

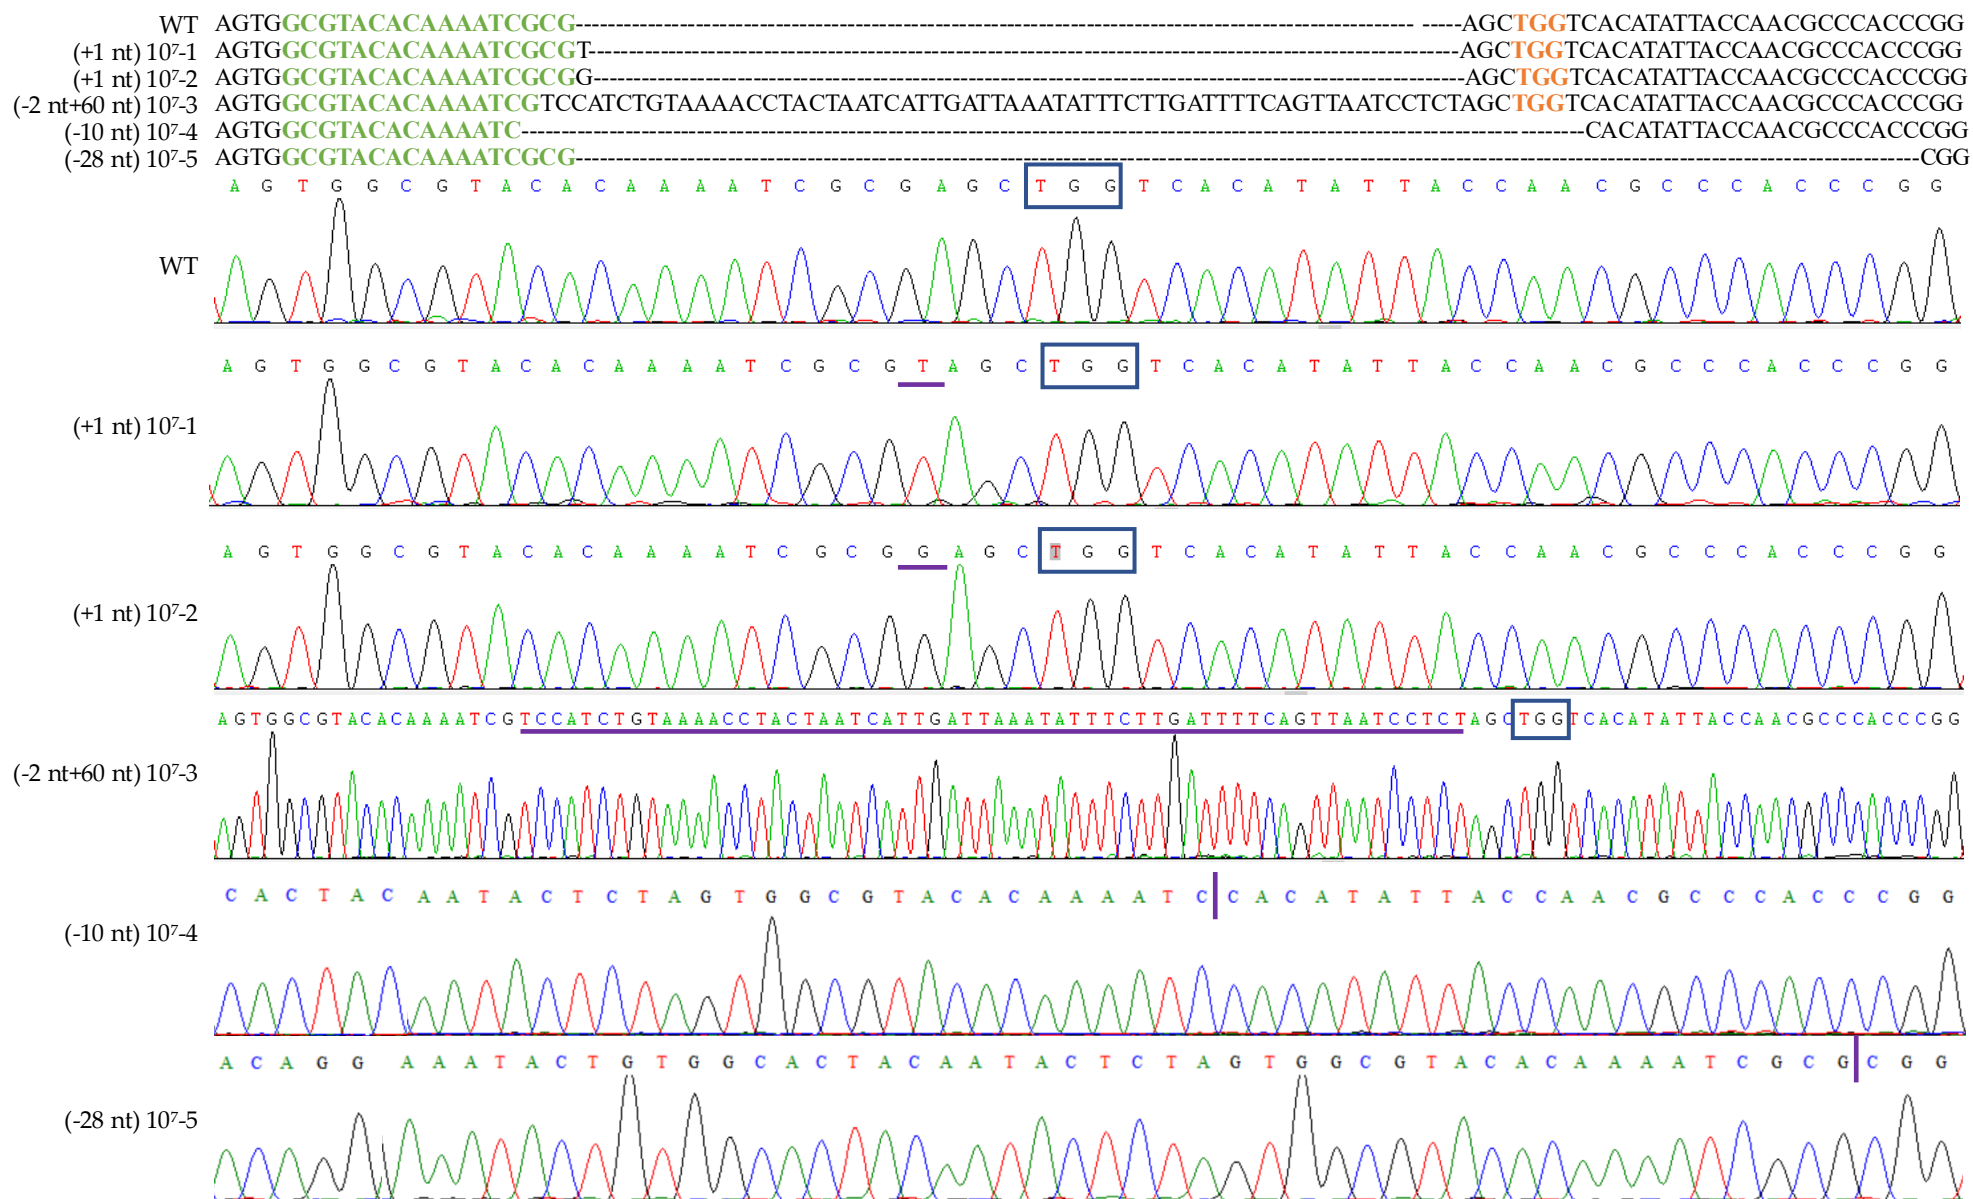

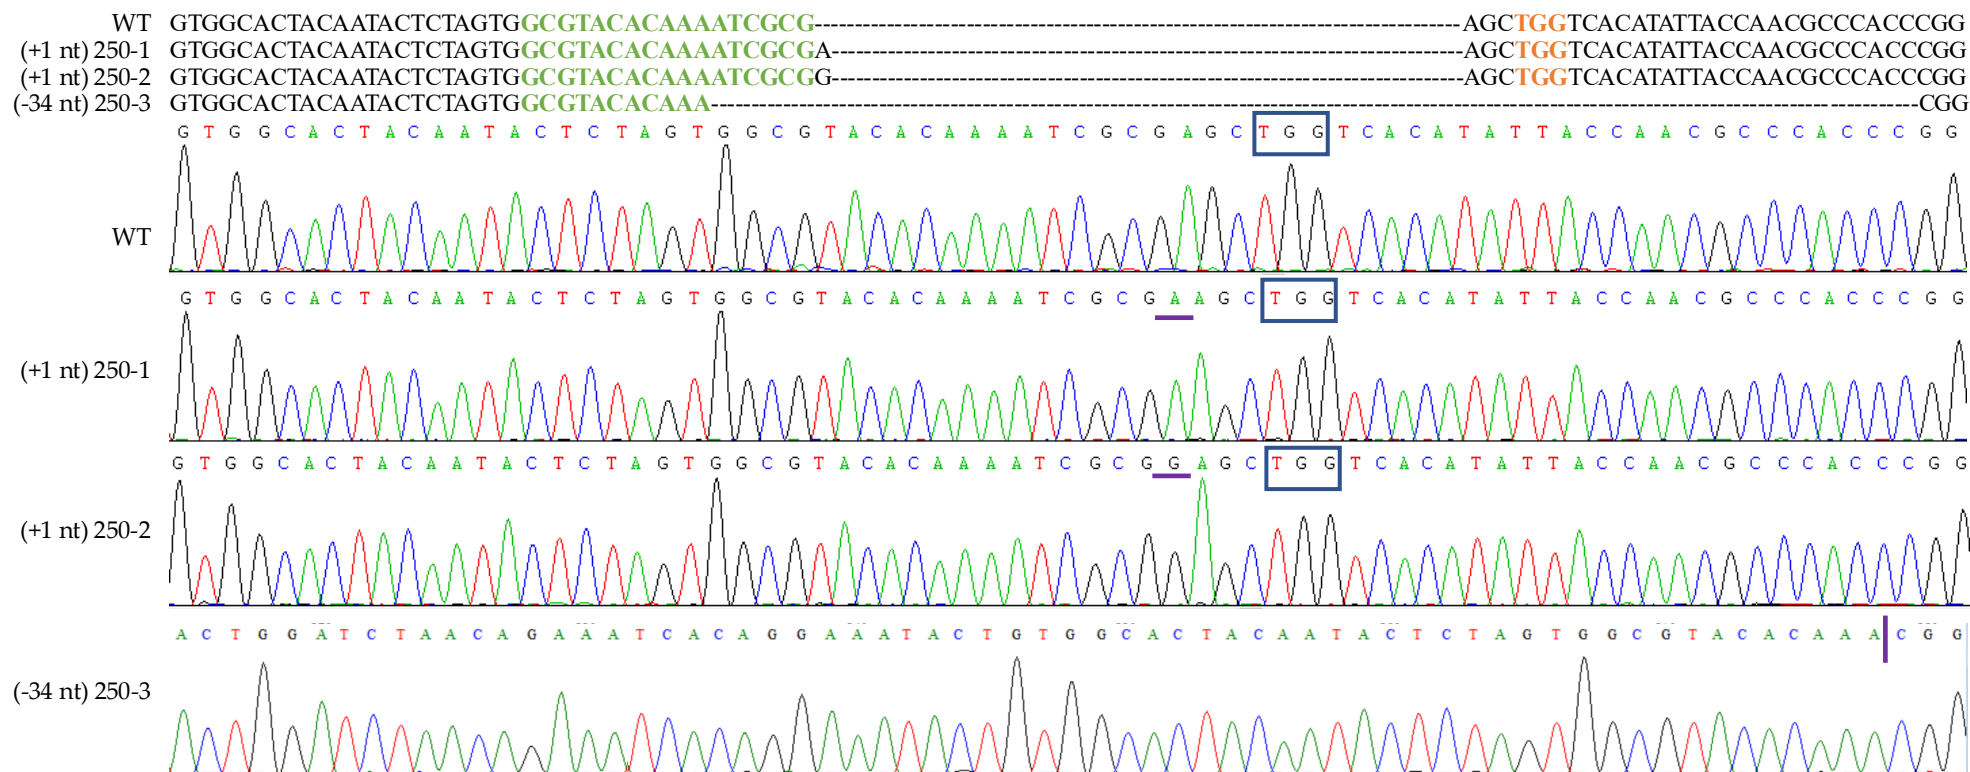

WT GTGGCACTACAATACTCTAGTGGCGGTACACAAAATCGCG-----AGCTGGTCACATATTACCAACGCCACCCGG  
 (+1 nt) 300-1 GTGGCACTACAATACTCTAGTGGCGGTACACAAAATCGCGT-----AGCTGGTCACATATTACCAACGCCACCCGG  
 (-78 nt) 300-2 AGC-----AGCTGGTCACATATTACCAACGCCACCCGG  
 (-65 nt) 300-3 G-----CCGG  
 (+115 nt) 300-4 GTGGCACTACAATACTCTAGTGGCGGTACACAAAATCGCGGTGAAGATTATCCTTCCCGTCCATTTCATCATGTGCGCGCGTCAAAATCGCGTCTCCCGCTCACCATCGTCTTACCAGCCCGTCGCTGCCAGAAAGCGCTCGTCAATGCTAGCTGGTCACATATTACCA

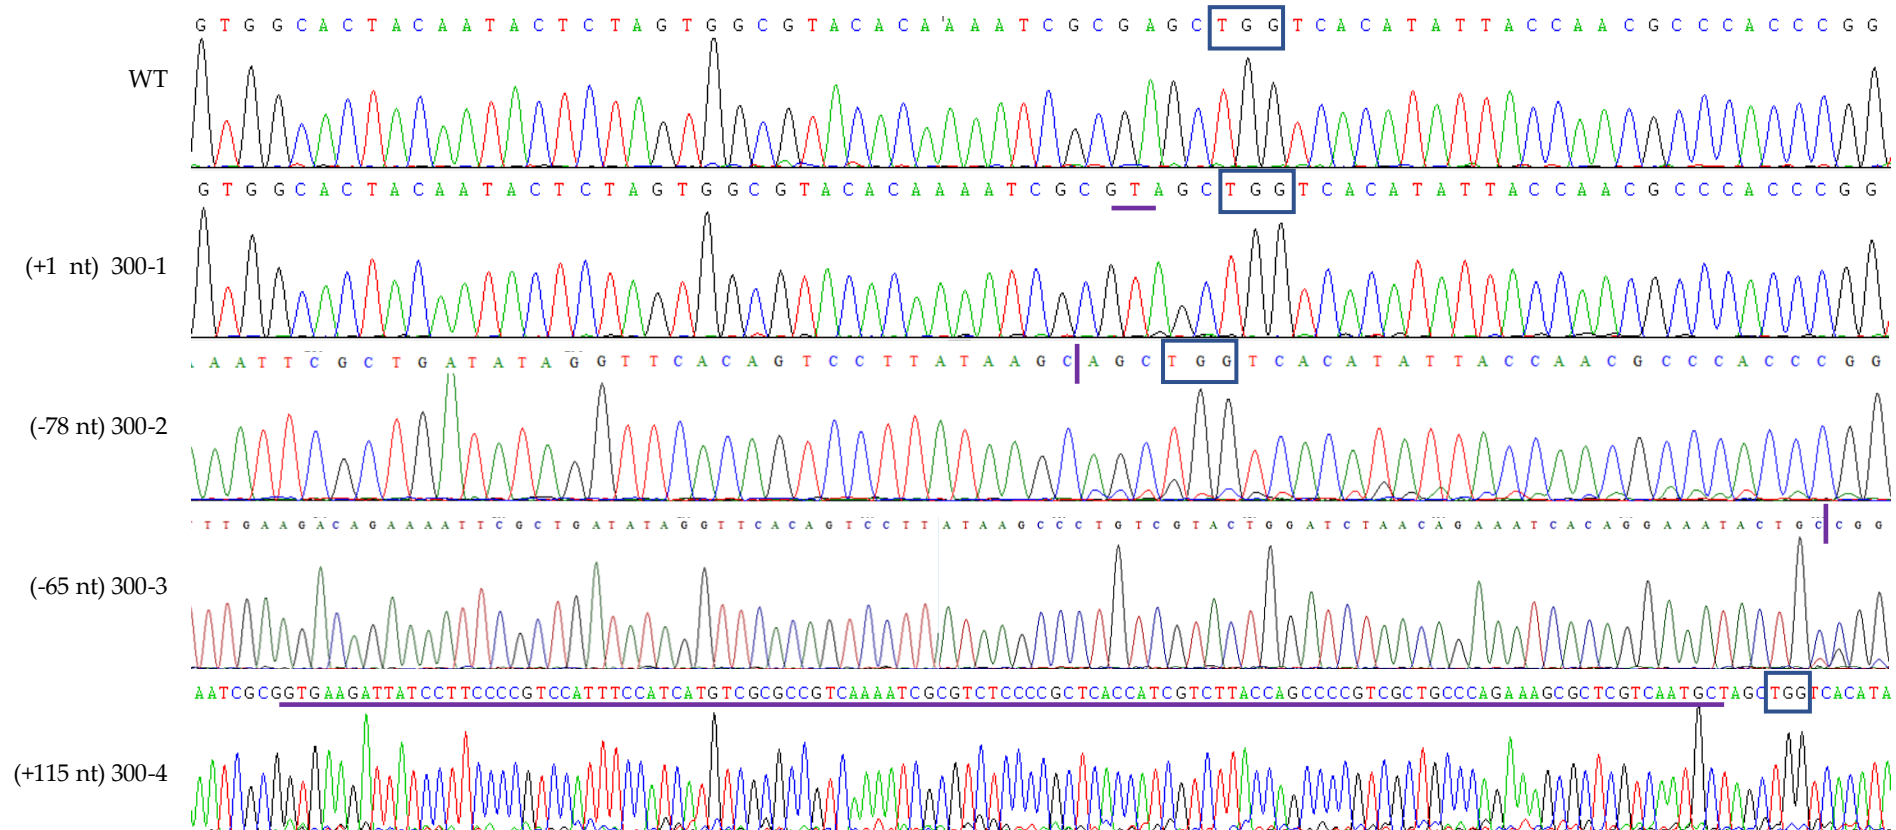

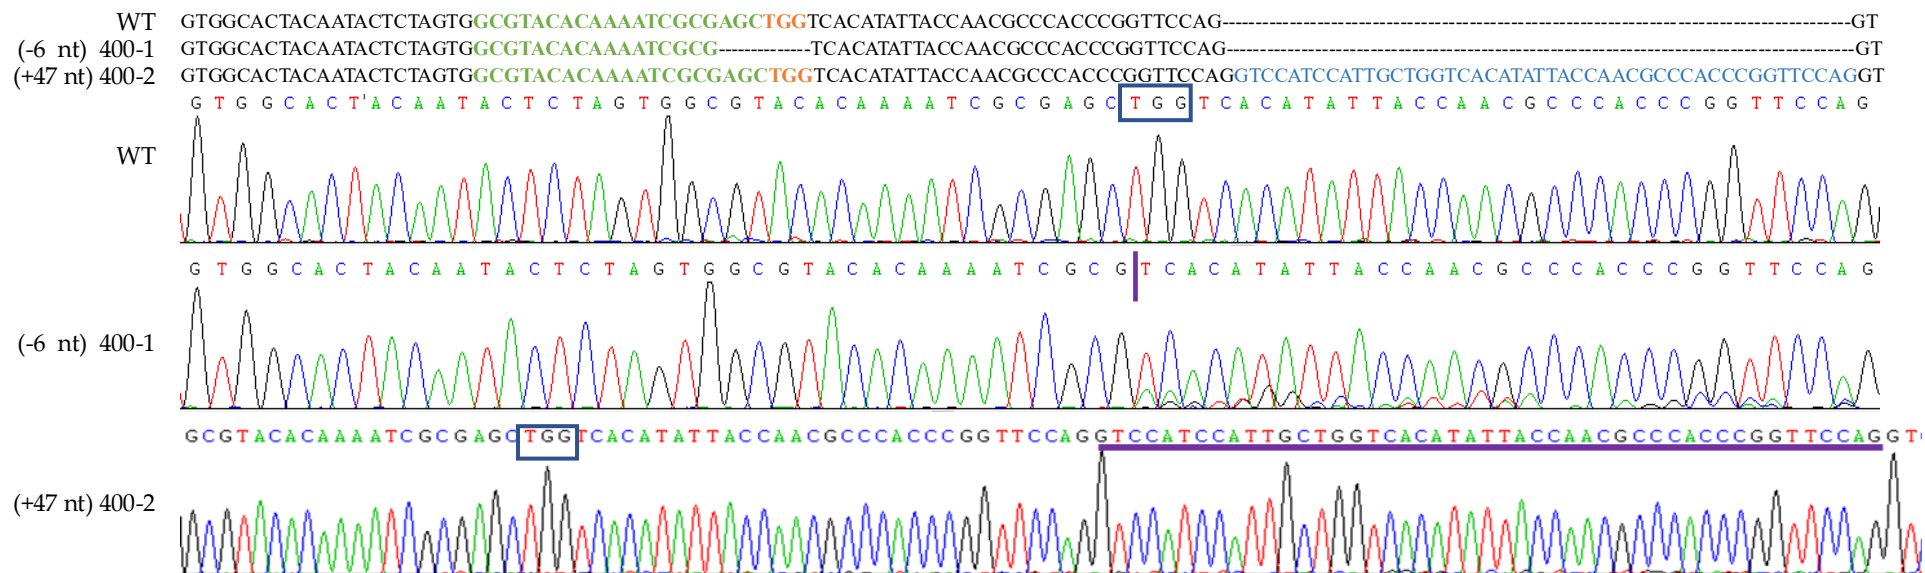

Figure S1. Chromatogram and alignment of pyrG sequences and corresponding mutants.
